# Supplementary material
Source: PubMed Central journal article supplement (PMC6279496)

# Supplementary Figure 3

**A**

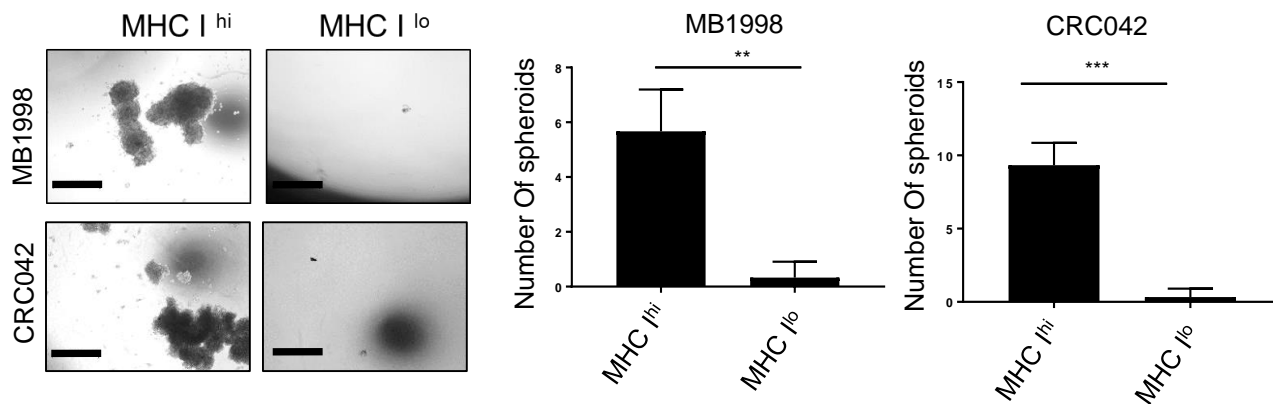

**B**

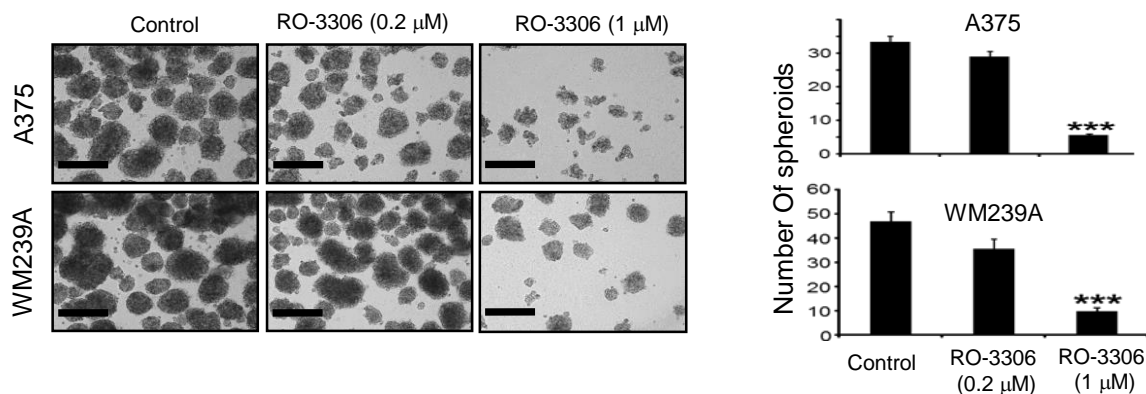

**C**

|                | Tumor development<br>(# tumors/# implantation sites) |       |      | TIC<br>frequency | P value |
|----------------|------------------------------------------------------|-------|------|------------------|---------|
|                | 10,000                                               | 1,000 | 100  |                  |         |
| <b>Day 28</b>  |                                                      |       |      |                  |         |
| Vehicle        | 16/16                                                | 11/16 | 9/16 | 1 in 495         |         |
| CDK1 inhibitor | 12/16                                                | 5/16  | 2/16 | 1 in 5,072       | 0.0001  |

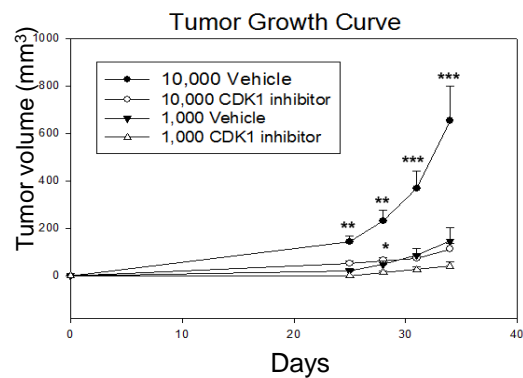

**D**

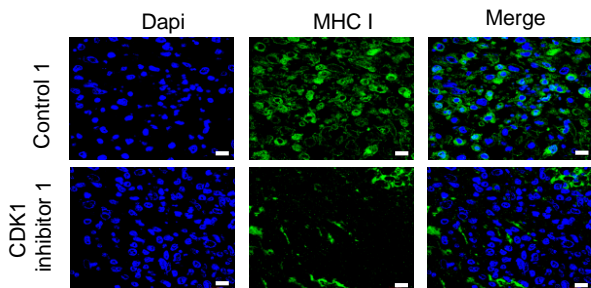

**E**

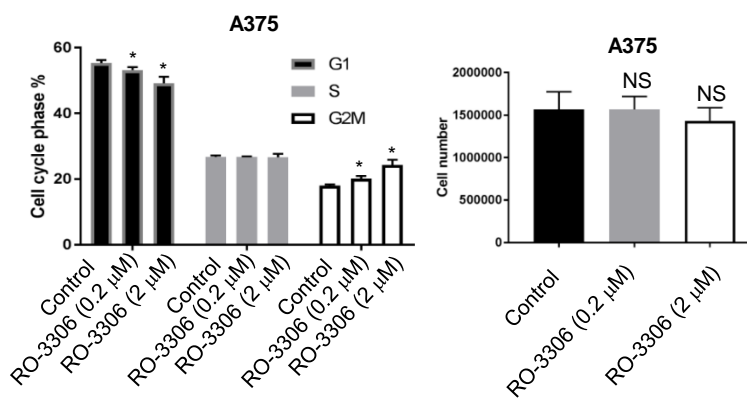

Supplement: NIHMS1508727-supplement-4.pdf [file NIHMS1508727-supplement-4.pdf]
