# Supplementary material
Source: PubMed Central journal article supplement (PMC6279496)

# Supplementary Figure 1

**A**

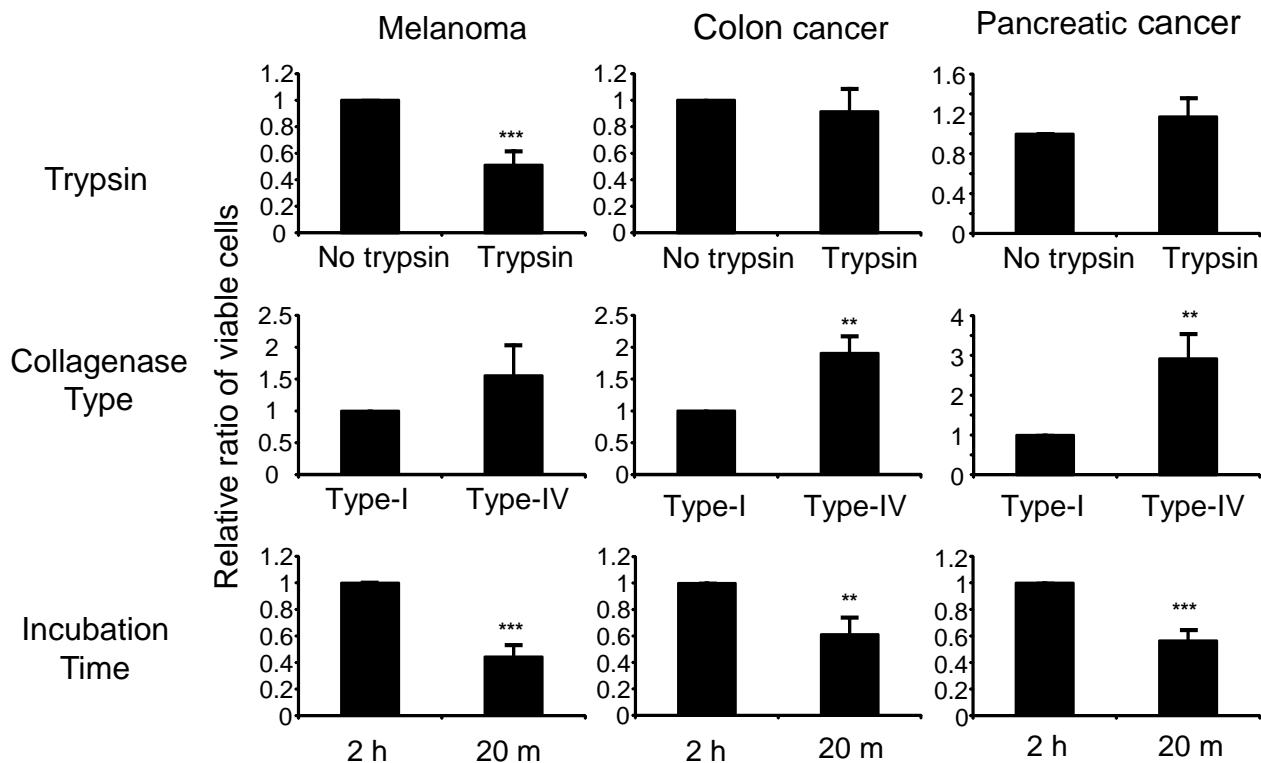

**B**

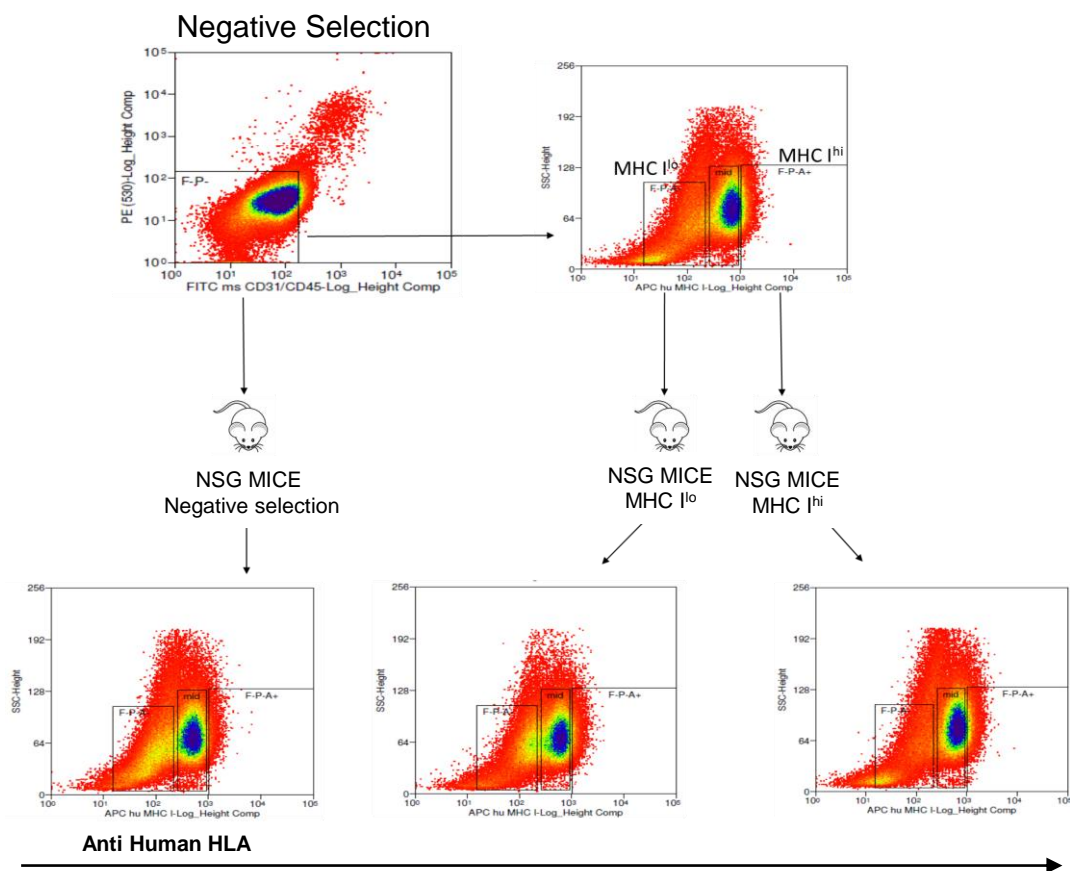

Supplement: NIHMS1508727-supplement-2.pdf [file NIHMS1508727-supplement-2.pdf]

# Supplementary Figure 2

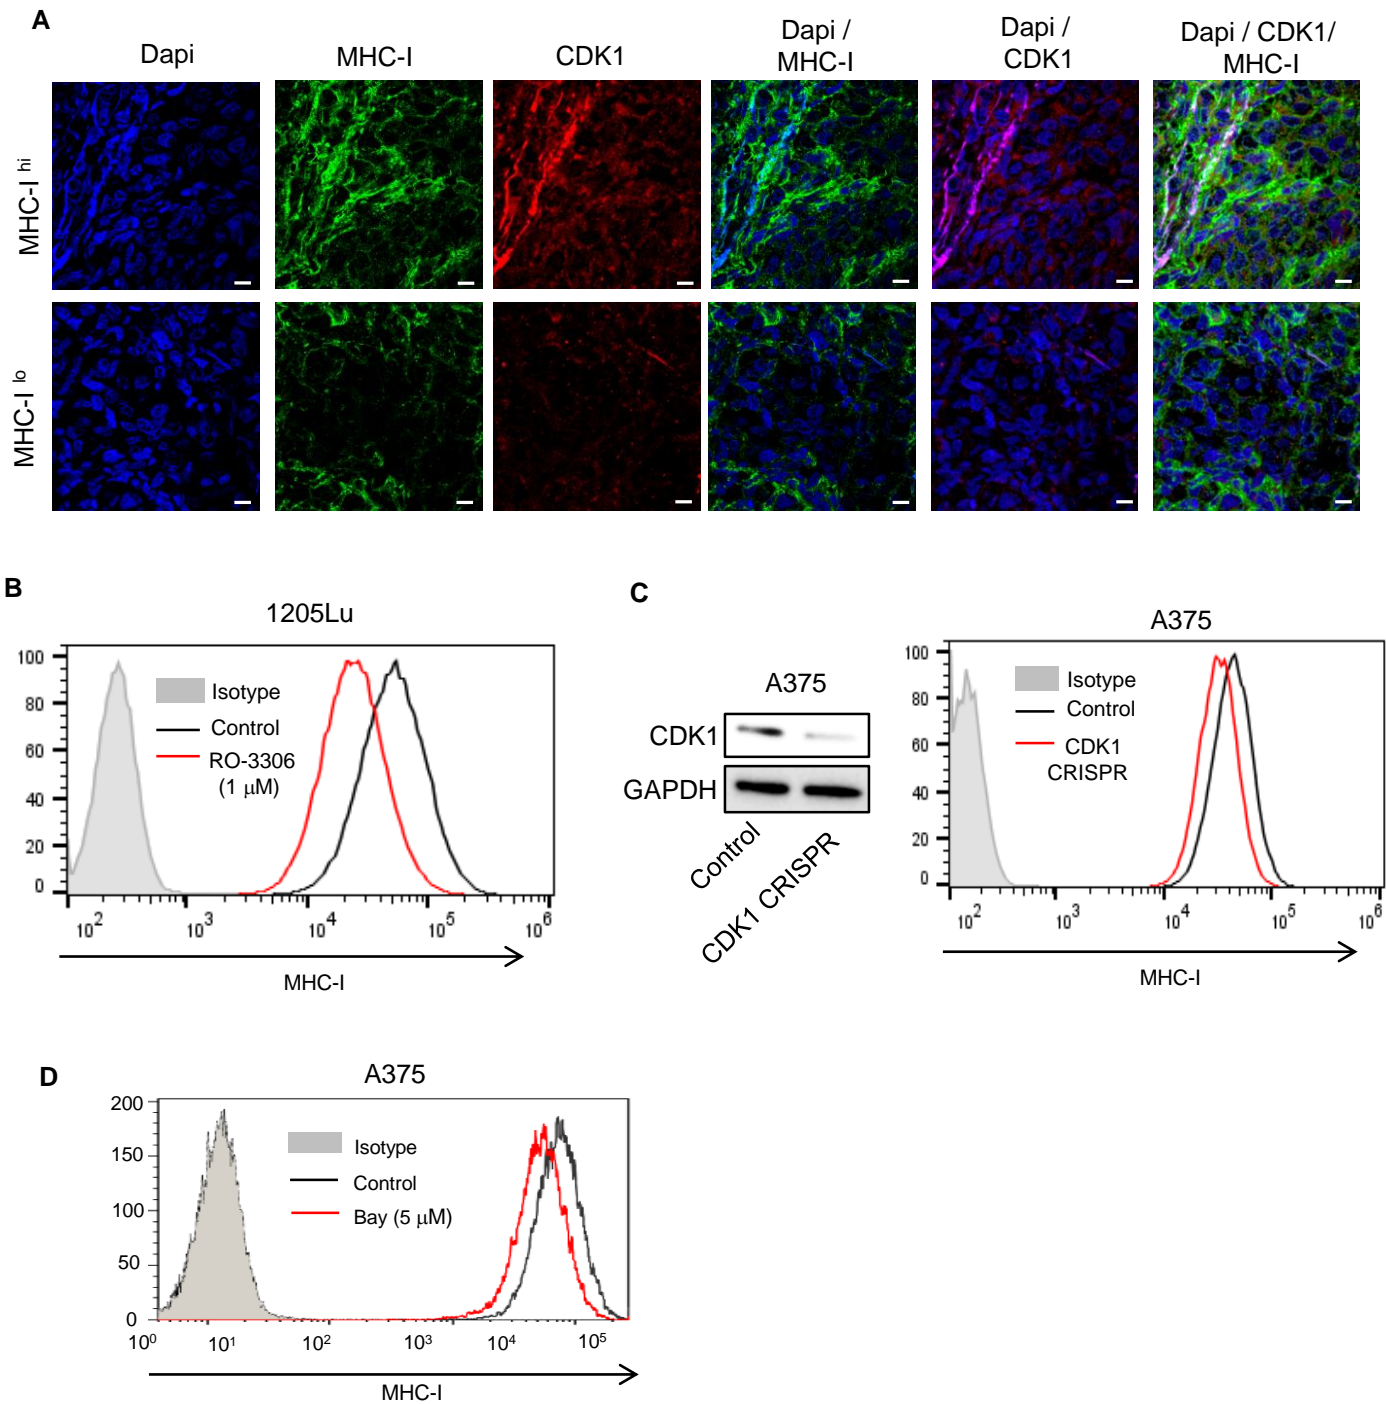

Supplement: NIHMS1508727-supplement-3.pdf [file NIHMS1508727-supplement-3.pdf]

# Supplementary Figure 4

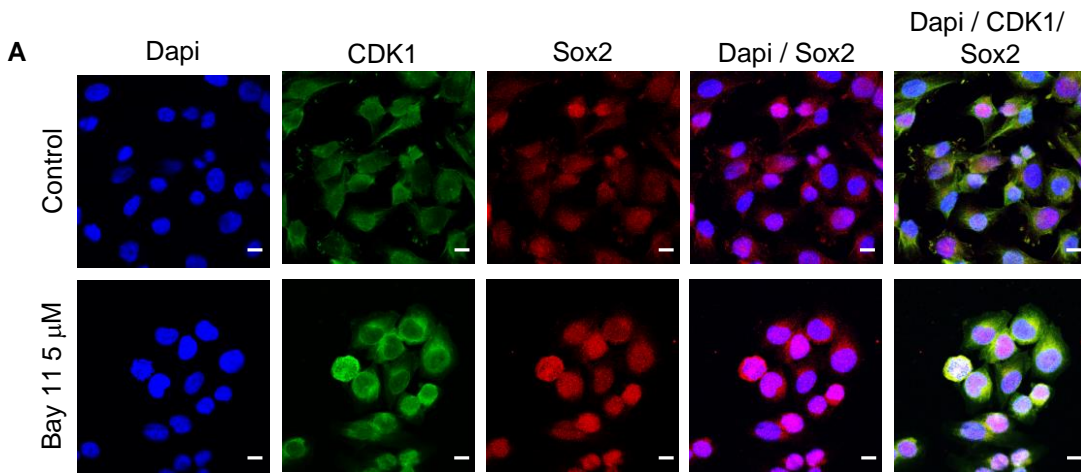

Supplement: NIHMS1508727-supplement-5.pdf [file NIHMS1508727-supplement-5.pdf]
